# Supplementary material for: A multispectral 3D live organoid imaging platform to screen probes for fluorescence guided surgery
Source: PubMed Central journal article supplement (PMC11251264; doi:10.1038/s44321-024-00084-4), 2024-06-03
Supplement: 44321_2024_84_MOESM10_ESM.pdf [file 44321_2024_84_MOESM10_ESM.pdf]

## Expanded View Figures

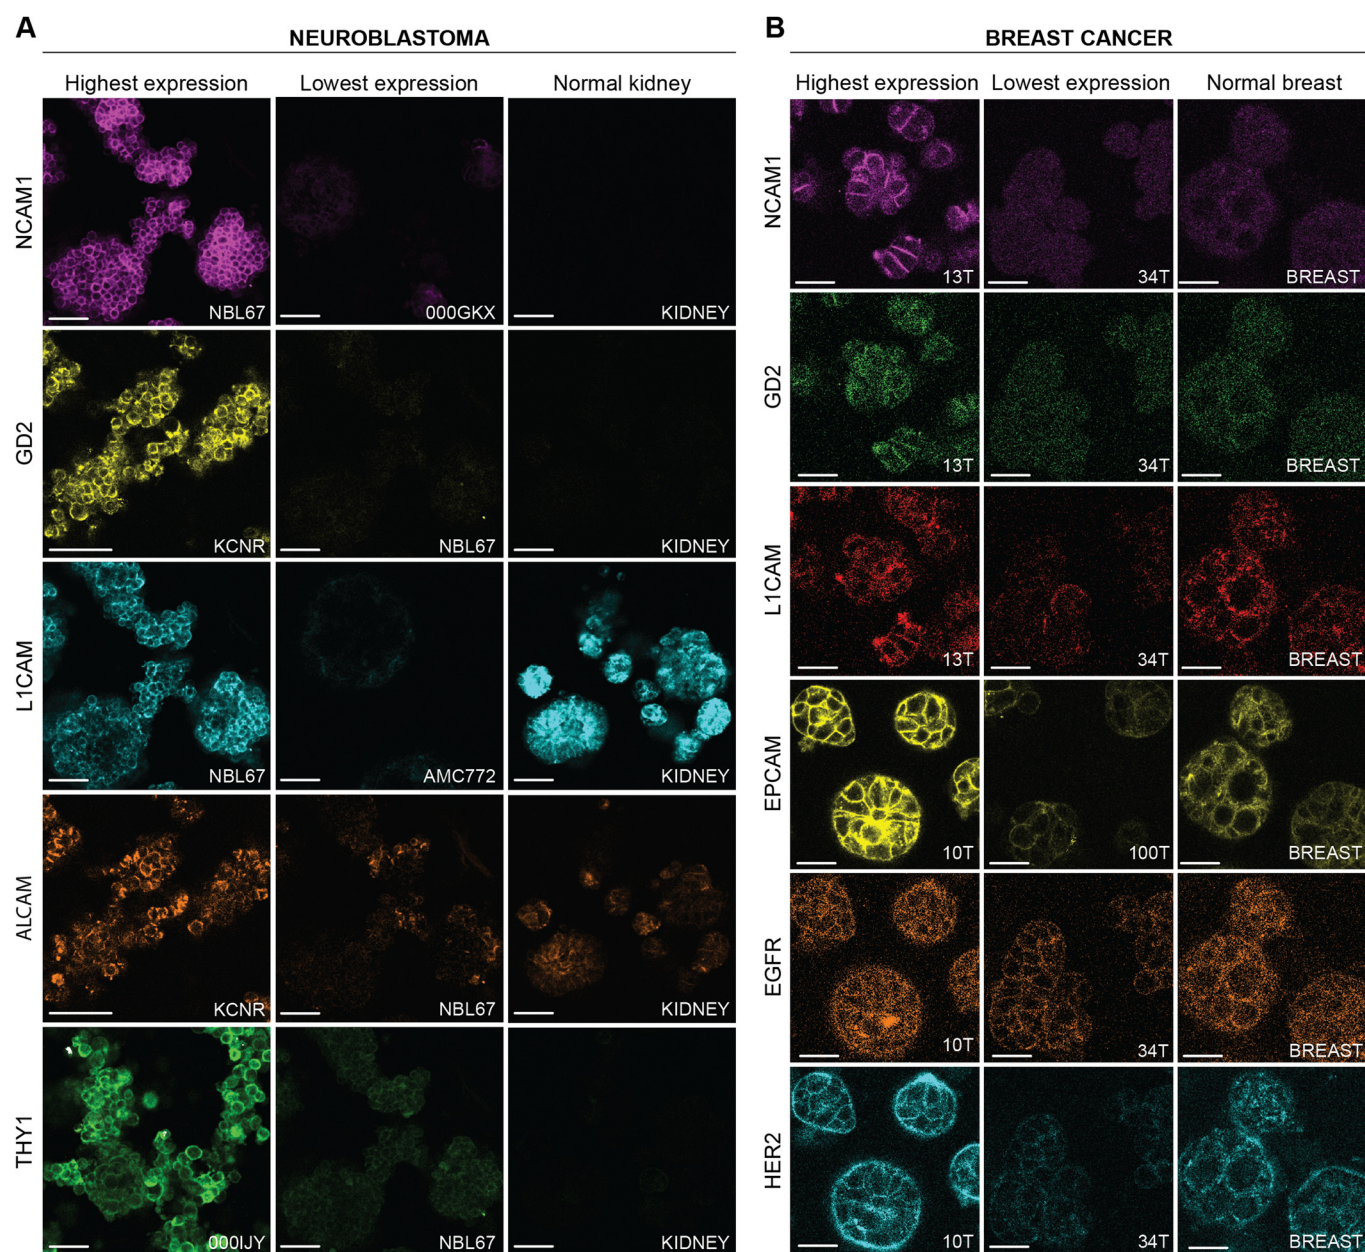

**Figure EV1. Representative single-channel optical sections.**

(A, B) Images of optical sections representing the highest (left) and lowest (middle) expression of the screened probes and expression on a healthy tissue control organoid line (right) for NB (A) and BC (B). Scale bars 50  $\mu$ m (A) and 30  $\mu$ m (B).

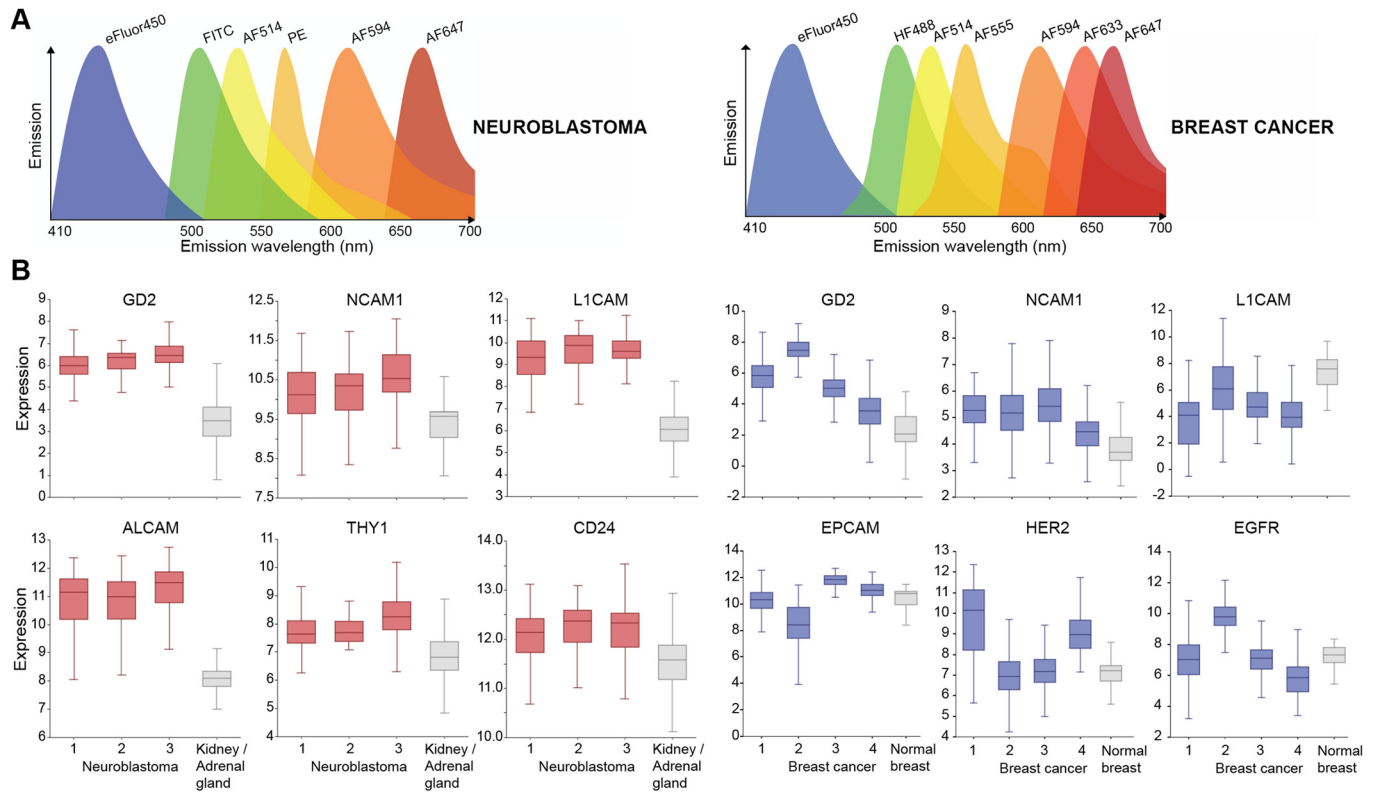

**Figure EV2. Emission spectra and target selection.**

(A) Schematic representation of the fluorophore emission spectra for 7-color imaging of NB (left) and BC (right). (B) Box plot depicting relative target gene expression from R2 RNA sequencing datasets for NB (left) and BC (right) and respective adjacent healthy control tissue. Centre: median, bounds: Q1-Q3, whiskers extend to minimum/maximum limited to 1.5 times the IQR. Details of sequencing datasets, including sample size, is provided in Methods.

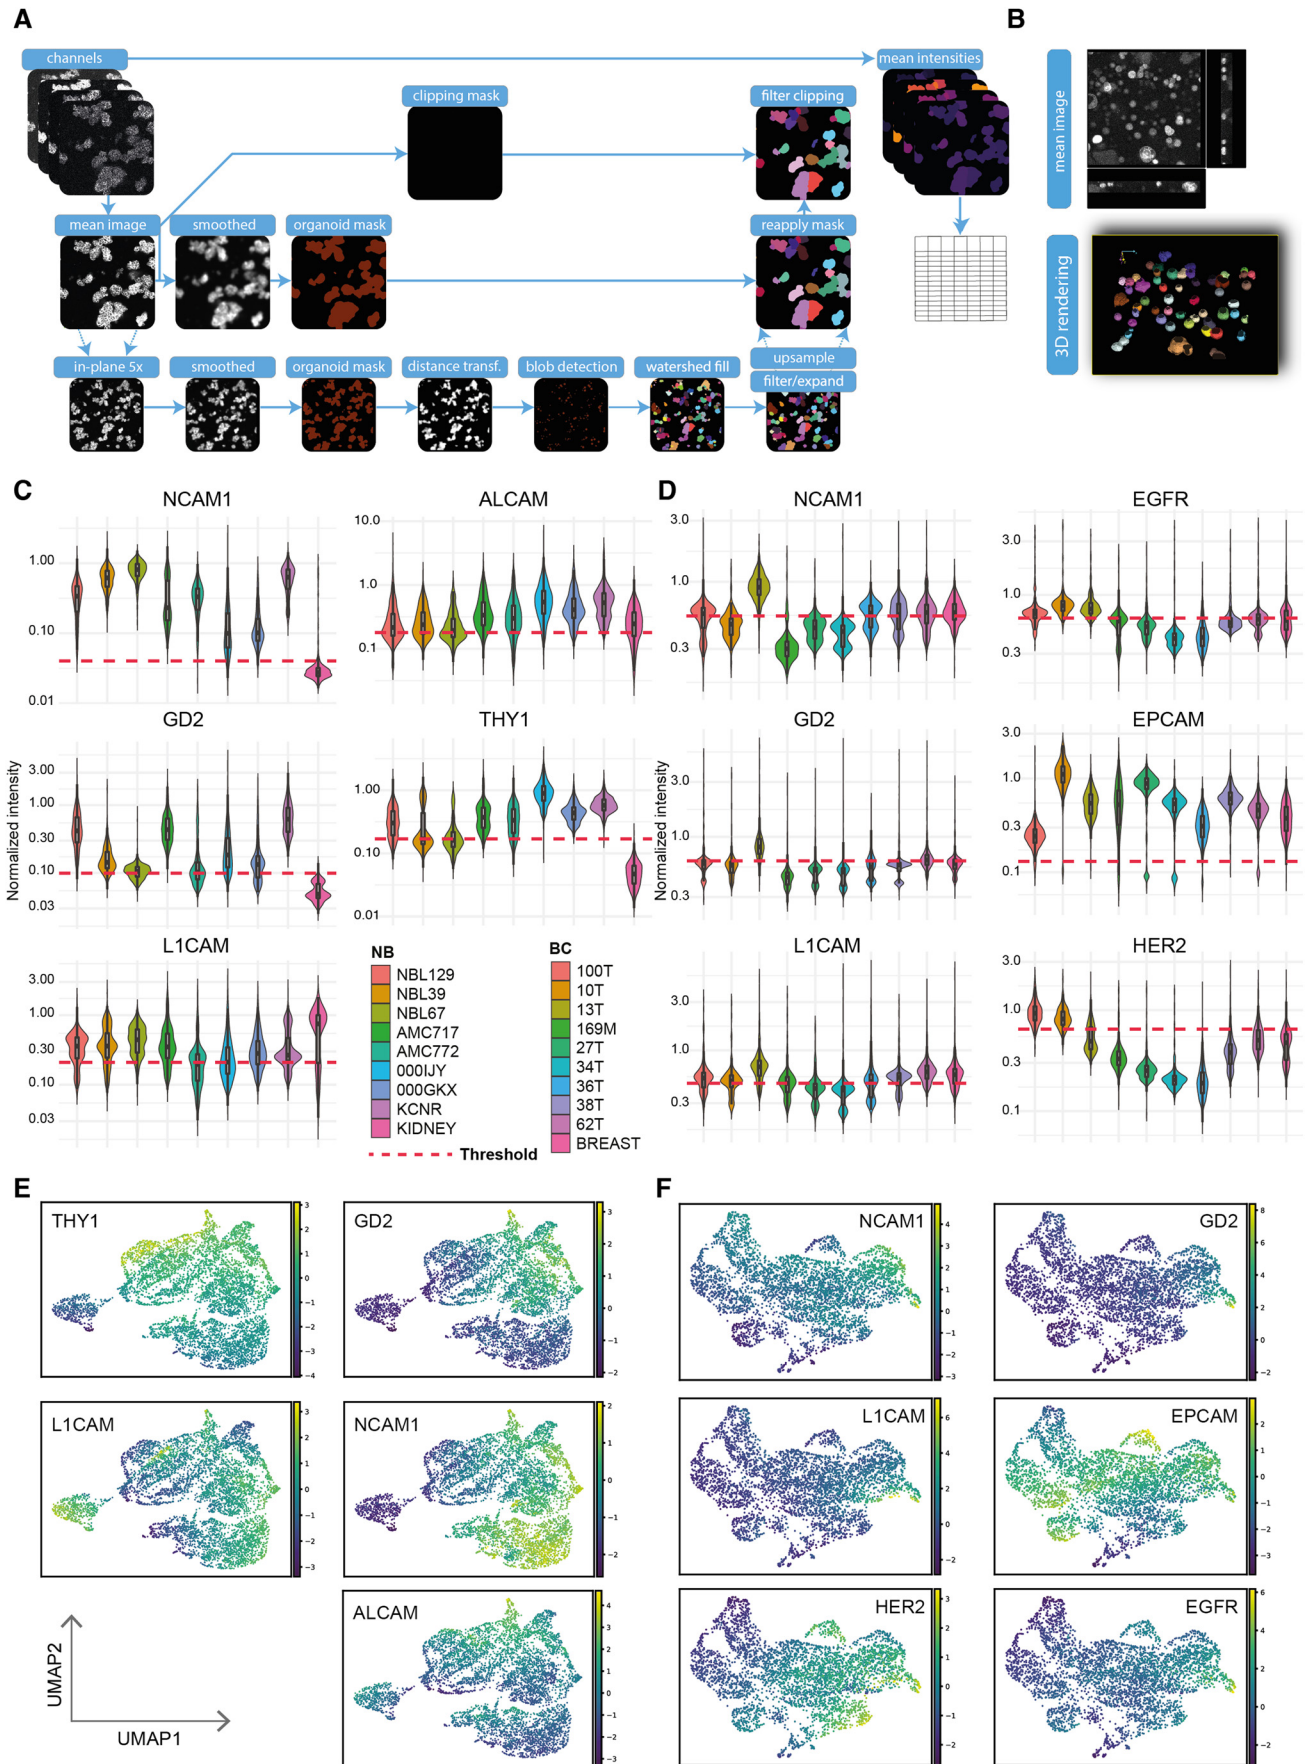

**◀ Figure EV3. STAPL-3D pipeline optimized for individual organoid segmentation and fluorescent intensity extraction.**

(A) Schematic representation of the STAPL-3D pipeline with key optimization steps for single organoid segmentation. (B) Representative raw 3D imaging data and associated 3D rendered single organoid segmentation. (C, D) Violin plots of the mean fluorescent intensities (MFI) of the screened probes for all individual organoids from the NB (C) and BC (D) PDO biobanks normalized for the experimental day and probe. Dashed line indicates the cut-off used for considering an organoid as positively stained. Boxplots inside violin plots; centre: median, bounds: Q1-Q3, whiskers extend to minimum/maximum limited to 1.5 times the IQR.  $n = 3$  independent experiments. (E, F) Representation of the spatial target distribution used for UMAP clustering of both the NB (E) and BC (F) PDO biobank.  $n = 3$  independent experiments.

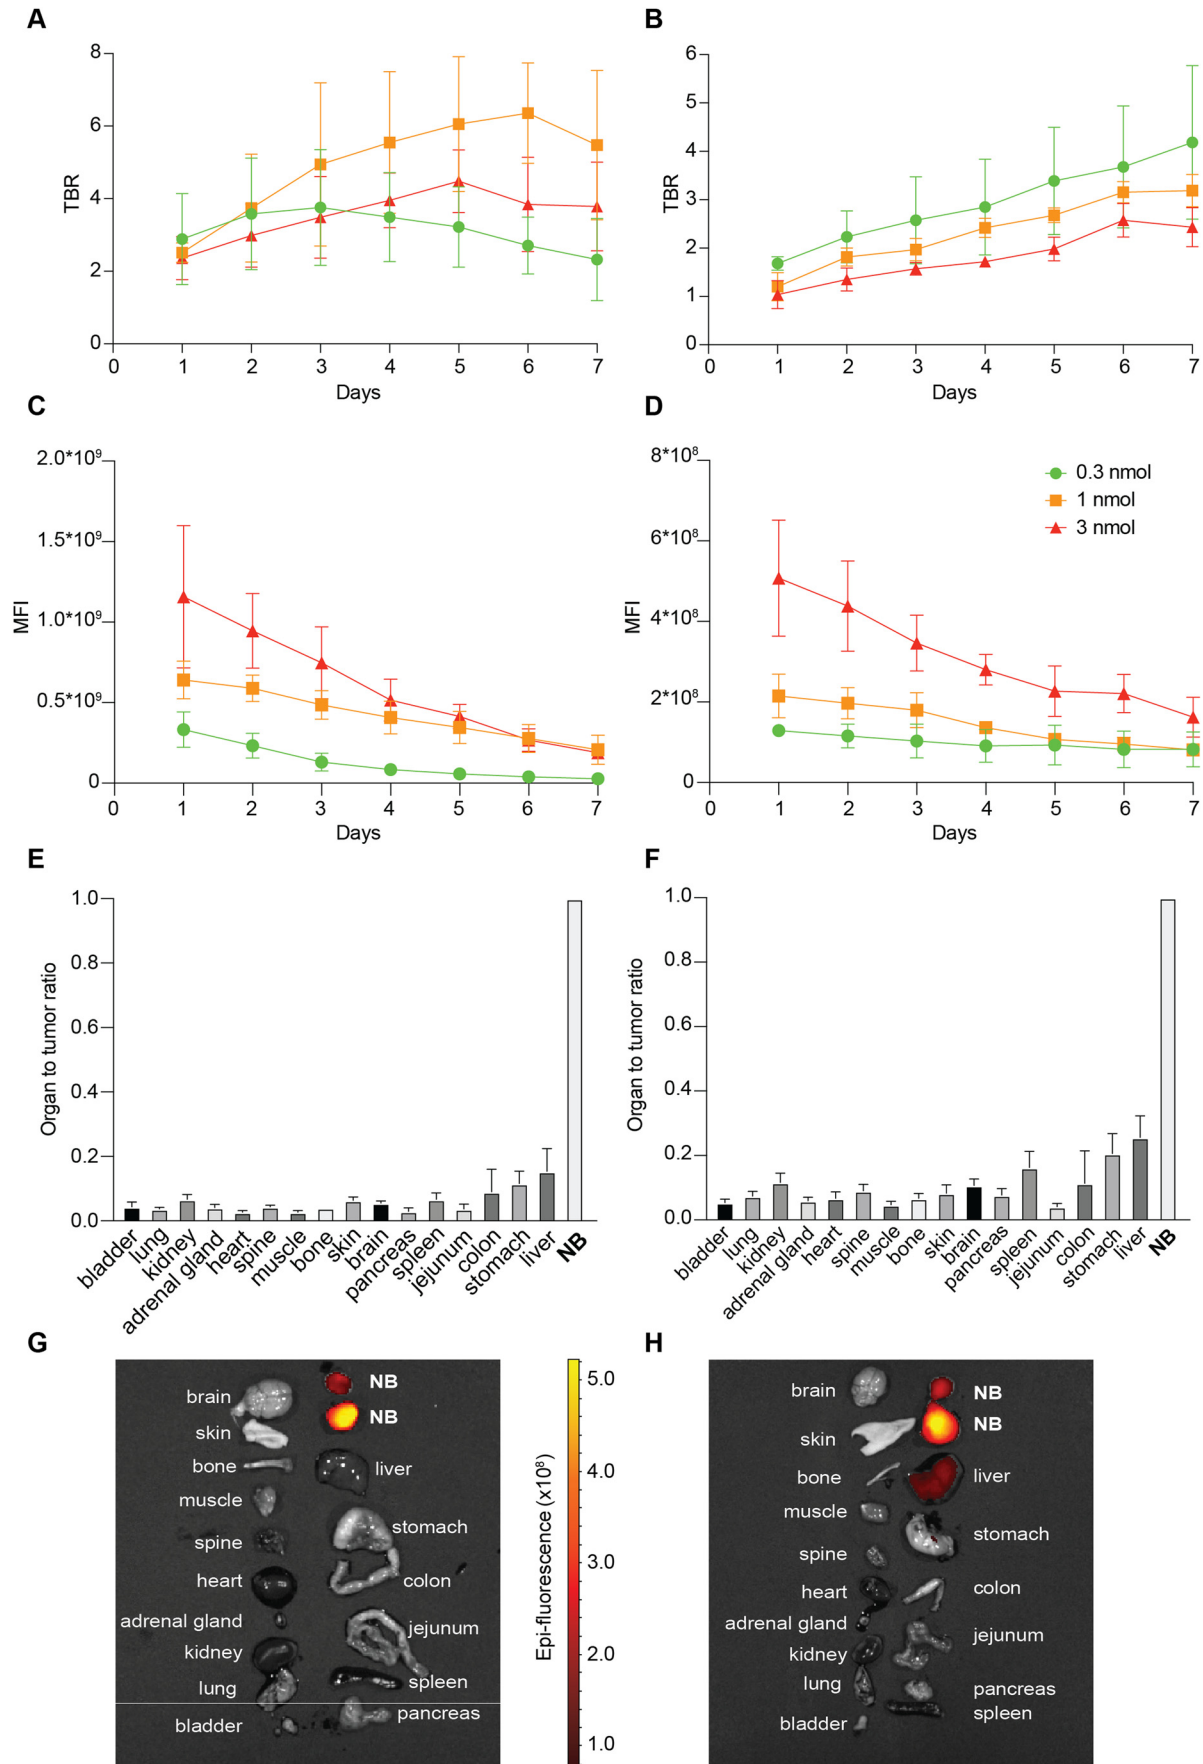

**◀ Figure EV4. In vivo testing of anti-GD2-IRDye800CW and anti-L1CAM-IRDye800CW in NB xenografts.**

(A–D) Line graph depicting the TBR (A, B) and MFI (C, D) of anti-GD2-IRDye800CW (A, C) and anti-L1CAM-IRDye800CW (B, D) per dose on 7 consecutive days. Mean TBR or MFI  $\pm$  SD as imaged with the IVIS Spectrum system,  $n = 3$  to 4 mice per dose group. (E, F) Bargraphs of the biodistribution of anti-GD2-IRDye800CW at day 5 (E) and anti-L1CAM-IRDye800CW at day 6 (F) in subcutaneous NB tumor-bearing mice receiving a 1 nmol dose. Mean MFI of organs and tissues normalized to the tumor  $\pm$  SD of  $n = 3$  mice per probe. (G, H) Representative images of the biodistribution of anti-GD2-IRDye800CW at day 5 (G) and anti-L1CAM-IRDye800CW at day 6 (H) in subcutaneous NB tumor-bearing mice receiving a 1 nmol dose.

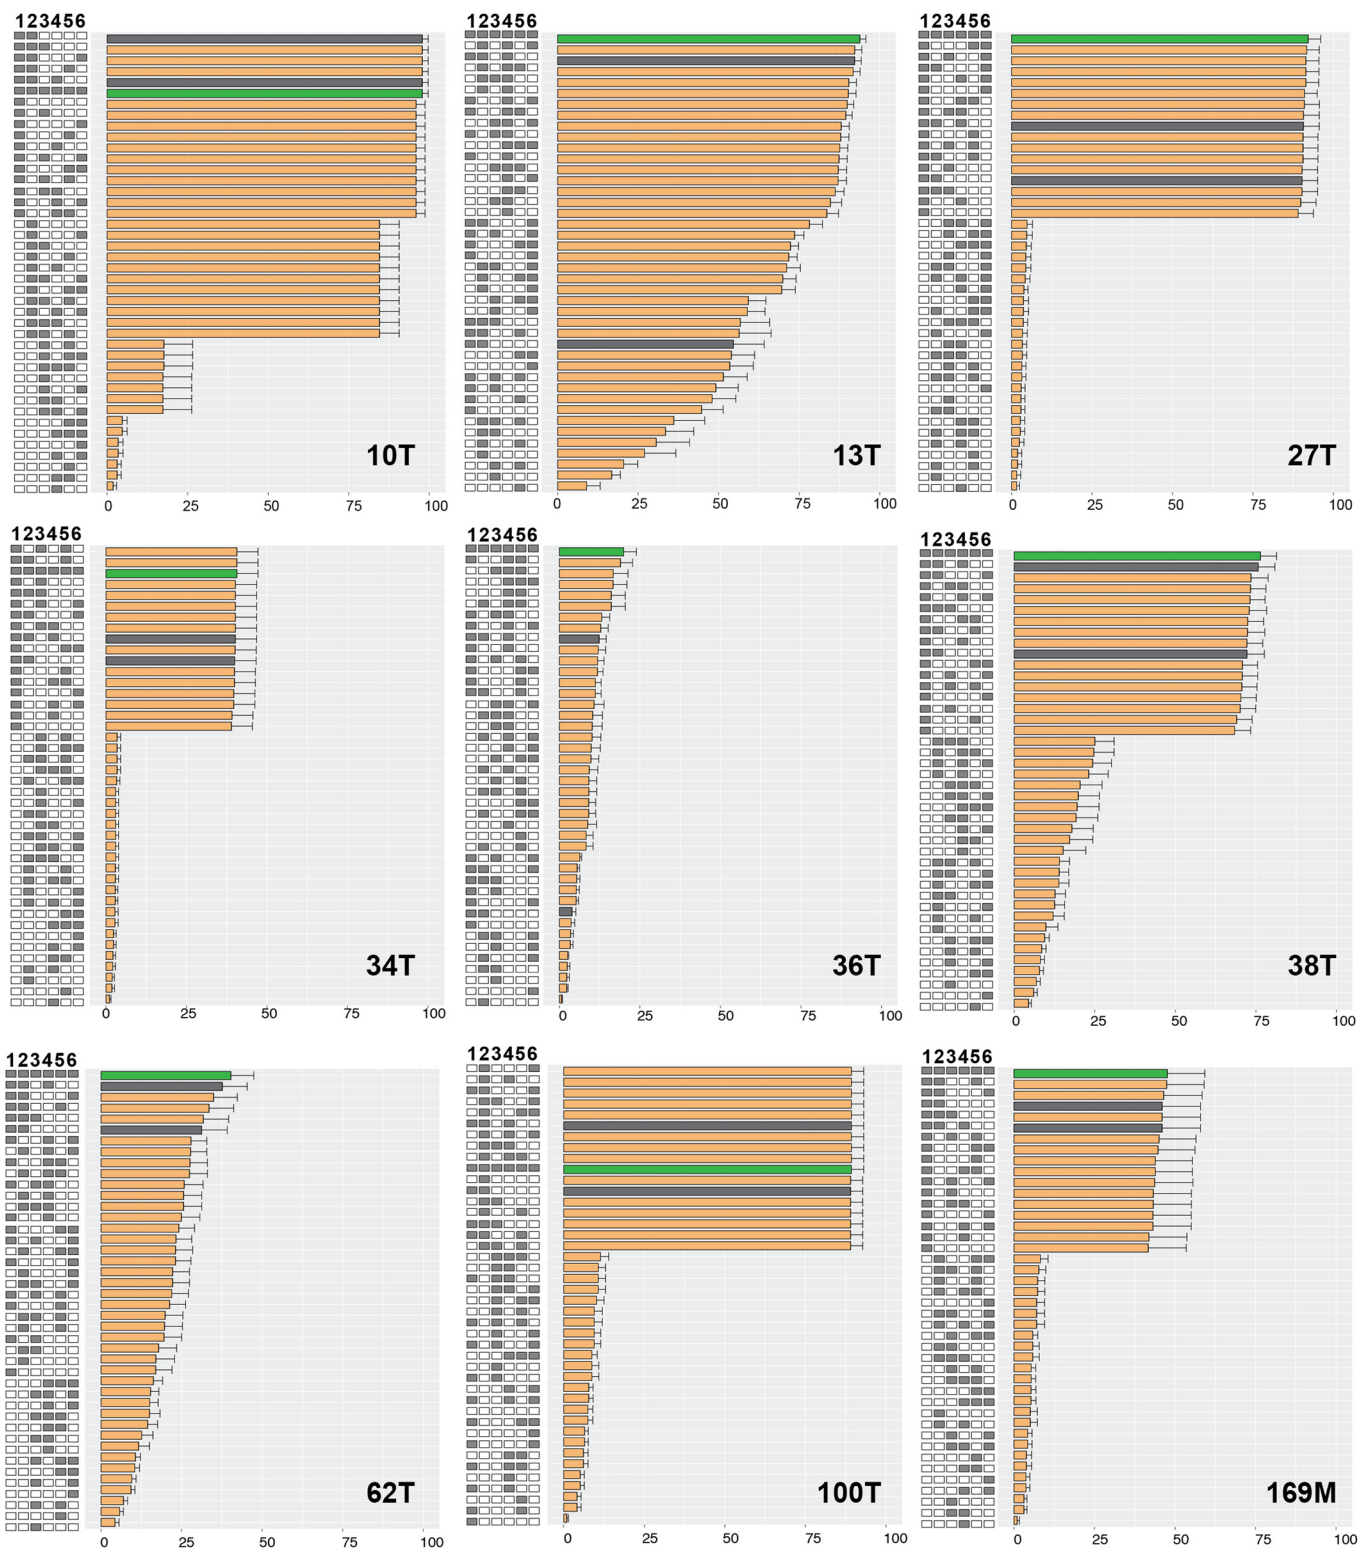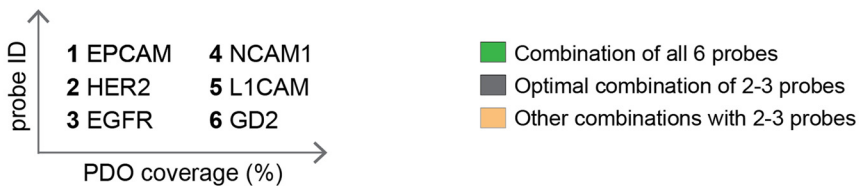

**◀ Figure EV5. Percentage organoid coverage with single probes and probe combinations per BC PDO line.**

Percentage BC organoids that are positive for individual probes or probe combinations. Gray bars depict the 2 overall most effective probe combinations with a limited number of probes. In case of similar percentages, combinations are ranked higher if they consist of less probes. Green bars represent the maximum achievable percentage of coverage obtained with the combination of all six probes tested. Bars depict mean percentage + SEM of  $n = 3$  independent experiments.
